# Supplementary material for: Hub Genes Related to the Pathogenesis and Progression of Colorectal Cancer and Adenoma by Integrative Bioinformatics Approaches
Source: Research Square preprint supplement (doi:10.21203/rs.3.rs-637295/v1), 2021-06-25
Supplement: Supplementary file 1 [file aa9a63a78bf59d4b203ea12b.xlsx]

## Sheet: Sheet1
	Table4. GO and KEGG pathway enrichment analysis of the Up- and Downregulated DEGs.
	Expression		Category			Term
	Upregulated		GOTERM_BP_DIRECT			GO:0065007		biological regulation
			GOTERM_BP_DIRECT			GO:0008152		metabolic process
			GOTERM_BP_DIRECT			GO:0050896		response to stimulus
			GOTERM_BP_DIRECT			GO:0032501		multicellular organismal process
			GOTERM_BP_DIRECT			GO:0051179		localization
			GOTERM_BP_DIRECT			GO:0007154		cell communication
			GOTERM_BP_DIRECT			GO:0032502		developmental process
			GOTERM_BP_DIRECT			GO:0016043		cellular component organization
			GOTERM_BP_DIRECT			GO:0008283		cell proliferation
			GOTERM_BP_DIRECT			GO:0051704		multi-organism process
			GOTERM_BP_DIRECT			GO:0040007		growth
			GOTERM_BP_DIRECT			GO:0000003		reproduction
			GOTERM_CC_DIRECT			GO:0016020		membrane
			GOTERM_CC_DIRECT			GO:0005615		extracellular space
			GOTERM_CC_DIRECT			GO:0031982		vesicle
			GOTERM_CC_DIRECT			GO:0012505		endomembrane system
			GOTERM_CC_DIRECT			GO:0005634		nucleus
			GOTERM_CC_DIRECT			GO:0005829		cytosol
			GOTERM_CC_DIRECT			GO:0032991		protein-containing complex
			GOTERM_CC_DIRECT			GO:0031974		membrane-enclosed lumen
			GOTERM_CC_DIRECT			GO:0042995		cell projection
			GOTERM_CC_DIRECT			GO:0005783		endoplasmic reticulum
			GOTERM_CC_DIRECT			GO:0005856		cytoskeleton
			GOTERM_CC_DIRECT			GO:0005794		Golgi apparatus
			GOTERM_CC_DIRECT			GO:0005773		vacuole
			GOTERM_CC_DIRECT			GO:0005739		mitochondrion
			GOTERM_CC_DIRECT			GO:0031012		extracellular matrix
			GOTERM_CC_DIRECT			GO:0005768		endosome
			GOTERM_CC_DIRECT			GO:0031975		envelope
			GOTERM_CC_DIRECT			GO:0005694		chromosome
			GOTERM_CC_DIRECT			GO:0005811		lipid droplet
			GOTERM_CC_DIRECT			GO:0005840		ribosome
			GOTERM_MF_DIRECT			GO:0005515		protein binding
			GOTERM_MF_DIRECT			GO:0043167		ion binding
			GOTERM_MF_DIRECT			GO:0016787		hydrolase activity
			GOTERM_MF_DIRECT			GO:0000166		nucleotide binding
			GOTERM_MF_DIRECT			GO:0016740		transferase activity
			GOTERM_MF_DIRECT			GO:0005215		transporter activity
			GOTERM_MF_DIRECT			GO:0003676		nucleic acid binding
			GOTERM_MF_DIRECT			GO:0060089		molecular transducer activity
			GOTERM_MF_DIRECT			GO:0005198		structural molecule activity
			GOTERM_MF_DIRECT			GO:0030234		enzyme regulator activity
			GOTERM_MF_DIRECT			GO:0008289		lipid binding
			GOTERM_MF_DIRECT			GO:0003682		chromatin binding
			GOTERM_MF_DIRECT			GO:0060090		molecular adaptor activity
			GOTERM_MF_DIRECT			GO:0030246		carbohydrate binding
			GOTERM_MF_DIRECT			GO:0009055		electron transfer activity
			GOTERM_MF_DIRECT			GO:0016209		antioxidant activity
			KEGG_Pathway			hsa04978		Mineral absorption
			KEGG_Pathway			hsa04960		Aldosterone-regulated sodium reabsorption
			KEGG_Pathway			hsa00910		Nitrogen metabolism
			KEGG_Pathway			hsa04976		Bile secretion
			KEGG_Pathway			hsa04964		Proximal tubule bicarbonate reclamation
			KEGG_Pathway			hsa04919		Thyroid hormone signaling pathway
			KEGG_Pathway			hsa04971		Gastric acid secretion
			KEGG_Pathway			hsa04972		Pancreatic secretion
			KEGG_Pathway			hsa04530		Tight junction
			KEGG_Pathway			hsa04931		Insulin resistance
	Downregulated		GOTERM_BP_DIRECT			GO:0065007		biological regulation
			GOTERM_BP_DIRECT			GO:0008152		metabolic process
			GOTERM_BP_DIRECT			GO:0050896		response to stimulus
			GOTERM_BP_DIRECT			GO:0032501		multicellular organismal process
			GOTERM_BP_DIRECT			GO:0032502		developmental process
			GOTERM_BP_DIRECT			GO:0051179		localization
			GOTERM_BP_DIRECT			GO:0007154		cell communication
			GOTERM_BP_DIRECT			GO:0016043		cellular component organization
			GOTERM_BP_DIRECT			GO:0008283		cell proliferation
			GOTERM_BP_DIRECT			GO:0051704		multi-organism process
			GOTERM_BP_DIRECT			GO:0000003		reproduction
			GOTERM_BP_DIRECT			GO:0040007		growth
			GOTERM_CC_DIRECT			GO:0016020		membrane
			GOTERM_CC_DIRECT			GO:0005634		nucleus
			GOTERM_CC_DIRECT			GO:0031974		membrane-enclosed lumen
			GOTERM_CC_DIRECT			GO:0005829		cytosol
			GOTERM_CC_DIRECT			GO:0032991		protein-containing complex
			GOTERM_CC_DIRECT			GO:0005615		extracellular space
			GOTERM_CC_DIRECT			GO:0012505		endomembrane system
			GOTERM_CC_DIRECT			GO:0031982		vesicle
			GOTERM_CC_DIRECT			GO:0005856		cytoskeleton
			GOTERM_CC_DIRECT			GO:0005783		endoplasmic reticulum
			GOTERM_CC_DIRECT			GO:0042995		cell projection
			GOTERM_CC_DIRECT			GO:0005694		chromosome
			GOTERM_CC_DIRECT			GO:0005739		mitochondrion
			GOTERM_CC_DIRECT			GO:0005794		Golgi apparatus
			GOTERM_CC_DIRECT			GO:0031012		extracellular matrix
			GOTERM_CC_DIRECT			GO:0031975		envelope
			GOTERM_CC_DIRECT			GO:0005768		endosome
			GOTERM_CC_DIRECT			GO:0005773		vacuole
			GOTERM_CC_DIRECT			GO:0005840		ribosome
			GOTERM_CC_DIRECT			GO:0042579		microbody
			GOTERM_CC_DIRECT			GO:0005811		lipid droplet
			GOTERM_MF_DIRECT			GO:0005515		protein binding
			GOTERM_MF_DIRECT			GO:0043167		ion binding
			GOTERM_MF_DIRECT			GO:0003676		nucleic acid binding
			GOTERM_MF_DIRECT			GO:0016787		hydrolase activity
			GOTERM_MF_DIRECT			GO:0000166		nucleotide binding
			GOTERM_MF_DIRECT			GO:0016740		transferase activity
			GOTERM_MF_DIRECT			GO:0005215		transporter activity
			GOTERM_MF_DIRECT			GO:0060089		molecular transducer activity
			GOTERM_MF_DIRECT			GO:0030234		enzyme regulator activity
			GOTERM_MF_DIRECT			GO:0005198		structural molecule activity
			GOTERM_MF_DIRECT			GO:0003682		chromatin binding
			GOTERM_MF_DIRECT			GO:0030246		carbohydrate binding
			GOTERM_MF_DIRECT			GO:0008289		lipid binding
			GOTERM_MF_DIRECT			GO:0060090		molecular adaptor activity
			GOTERM_MF_DIRECT			GO:0016209		antioxidant activity
			KEGG_Pathway			hsa04110		Cell cycle
			KEGG_Pathway			hsa04657		IL-17 signaling pathway
			KEGG_Pathway			hsa04115		p53 signaling pathway
			KEGG_Pathway			hsa05219		Bladder cancer
			KEGG_Pathway			hsa05206		MicroRNAs in cancer
			KEGG_Pathway			hsa05222		Small cell lung cancer
			KEGG_Pathway			hsa04218		Cellular senescence
			KEGG_Pathway			hsa04350		TGF-beta signaling pathway
			KEGG_Pathway			hsa05224		Breast cancer
			KEGG_Pathway			hsa04390		Hippo signaling pathway
