# Supplementary material for: Hub Genes Related to the Pathogenesis and Progression of Colorectal Cancer and Adenoma by Integrative Bioinformatics Approaches
Source: Research Square preprint supplement (doi:10.21203/rs.3.rs-637295/v1), 2021-06-25
Supplement: Supplementary file 2 [file de5275262ae1845e700262fe.xlsx]

## Sheet: Sheet1
	Table5. KEGG Enrichment Analysis of the Hub Genes.
	Pathway ID		Name		Genes
	hsa04062		Chemokine signaling pathway		CXCL13, ADCY9, GNG2, CCL5, CCL19, CXCL12
	hsa04060		Cytokine-cytokine receptor interaction		CXCL13, CCL5, CCL19, CXCL12
	hsa04061		Viral protein interaction with cytokine and cytokine receptor		CXCL13, CCL5, CCL19, CXCL12
	hsa05200		Pathways in cancer		ADCY9, LPAR1, GNG2, CXCL12
	hsa04080		Neuroactive ligand-receptor interaction		LPAR1, PYY, SST, P2RY14
	hsa05163		Human cytomegalovirus infection		ADCY9, GNG2, CCL5, CXCL12
